# Supplementary material
Source: PubMed Central journal article supplement (PMC8259246)

**Supplementary Table 1: Detailed search strategy for the systematic review**

Search Strategy (Date: 29 July 2020)

|               |                                                                                                                                                                                                                                                                                                                                                                                                                                                                      |            |
|---------------|----------------------------------------------------------------------------------------------------------------------------------------------------------------------------------------------------------------------------------------------------------------------------------------------------------------------------------------------------------------------------------------------------------------------------------------------------------------------|------------|
| <p>Pubmed</p> | <p>((Inflammatory Bowel Disease OR<br/>Ulcerative colitis OR Crohn Disease OR<br/>Crohn's disease))</p> <p>AND</p> <p>(Coronavirus OR COVID-19 OR SARS-<br/>COV-2 OR nCOV)</p>                                                                                                                                                                                                                                                                                       | <p>194</p> |
| <p>Embase</p> | <p>('coronaviridae infection'/exp OR<br/>'coronaviridae infection' OR<br/>'coronavirus disease 2019'/exp OR<br/>'coronavirus disease 2019' OR 'sars-<br/>related coronavirus'/exp OR 'sars-<br/>related coronavirus') AND<br/>( 'inflammatory bowel disease'/exp OR<br/>'inflammatory bowel disease' OR<br/>'crohn disease'/exp OR 'crohn disease'<br/>OR 'ulcerative colitis'/exp OR<br/>'ulcerative colitis' OR (ulcerative AND<br/>'colitis'/exp OR colitis))</p> | <p>196</p> |
|               |                                                                                                                                                                                                                                                                                                                                                                                                                                                                      |            |

Supplementary Table 2: Excluded studies with reasons of exclusion

| <b>Reference</b> | <b>Setting</b>                                 | <b>Reason for exclusion</b>     |
|------------------|------------------------------------------------|---------------------------------|
| Allocca M        | Single centre- Italy                           | No relevant data                |
| Brenner EJ       | Multi-centre<br>Multiple countries             | Patients included in SECURE IBD |
| Bai X            | Single centre- China<br>Questionnaire          | No relevant data                |
| Clough JN        | Single centre- UK<br>Survey                    | No relevant data                |
| D' Amico F       | Multi centre- Italy, France, Belgium<br>Survey | No relevant data                |
| D' Amico F       | Multi centre- Italy, France<br>Survey          | No relevant data                |
| Chen Y           | Single Centre- China<br>Survey                 | No relevant data                |

|          |                                              |                  |
|----------|----------------------------------------------|------------------|
| Khan N   | Single Centre- USA                           | No relevant data |
| Chen J   | Single centre- China<br>Questionnaire        | No relevant data |
| Lees CW  | Multi centre- Multiple countries<br>Survey   | No relevant data |
| Azzam NA | Single centre- Saudi Arabia<br>Questionnaire | No relevant data |

References for Supplementary Table

1. Allocca M, Fiorino G, Furfaro F, et al. Maintaining the Quality Standards of Care for Inflammatory Bowel Disease Patients During the COVID-19 Pandemic. *Clin Gastroenterol Hepatol*. 2020;18(8):1882-1883.
2. Brenner EJ, Ungaro RC, Geary RB, et al. Corticosteroids, But Not TNF Antagonists, Are Associated With Adverse COVID-19 Outcomes in Patients With Inflammatory Bowel Diseases: Results From an International Registry. *Gastroenterology*. 2020;S0016-5085(20)30655-7\
3. Bai X, Yang H, Qian J. COVID-19 outbreak and inflammatory bowel disease management: a questionnaire survey from realistic practice. *J Crohns Colitis*. 2020;jjaa064. doi:10.1093/ecco-jcc/jjaa064
4. Clough JN, Hill KL, Duff A, et al. Managing an IBD Infusion Unit During the COVID-19 Pandemic: Service Modifications and the Patient Perspective. *Inflamm Bowel Dis*. 2020;izaa171. doi:10.1093/ibd/izaa171
5. D'Amico F, Rahier JF, Leone S, Peyrin-Biroulet L, Danese S. Views of patients with inflammatory bowel disease on the COVID-19 pandemic: a global survey. *Lancet Gastroenterol Hepatol*. 2020;5(7):631-632.
6. D'Amico F, Danese S, Peyrin-Biroulet L; ECCO COVID taskforce. Inflammatory Bowel Disease Management During the Coronavirus-19 Outbreak: A Survey From the European Crohn's and Colitis Organization. *Gastroenterology*. 2020;159(1):14-19.e3.
7. Chen Y, Hu S, Wu H, et al. Patterns of care for inflammatory bowel disease in China during the COVID-19 pandemic. *Lancet Gastroenterol Hepatol*. 2020;5(7):632-634.

8. Khan N, Patel D, Xie D, Pernes T, Lewis J, Yang YX. Adherence of infusible biologics during the time of COVID-19 among patients with Inflammatory Bowel Disease: A nationwide VA cohort study. *Gastroenterology*. 2020;S0016-5085(20)34845-9. doi:10.1053/j.gastro.2020.06.044
9. Chen J, Peng X, Zhang M, Zhi M. Impact of medication discontinuation on patients with inflammatory bowel disease during the COVID-19 outbreak. *Gastroenterology*. 2020;S0016-5085(20)34779-X. doi:10.1053/j.gastro.2020.05.087
10. Lees CW, Regueiro M, Mahadevan U; International Organization for the Study of Inflammatory Bowel Disease. Innovation in IBD Care During the COVID-19 Pandemic: Results of a Global Telemedicine Survey by the International Organization for the Study of Inflammatory Bowel Disease. *Gastroenterology*. 2020;S0016-5085(20)34735-1. doi:10.1053/j.gastro.2020.05.063
11. Azzam NA, Aljebreen A, Almuhareb A, Almadi MA. Disability and quality of life before and during the COVID-19 outbreak: A cross-sectional study in inflammatory bowel disease patients. *Saudi J Gastroenterol*. 2020;10.4103/sjg.SJG\_175\_20. doi:10.4103/sjg.SJG\_175\_20

Supplementary Table 3: Studies depicting the impact of age on risk of COVID infection in IBD

| Study and Author |             | Patients of IBD without COVID-19 infection | Patients of IBD with COVID-19 infection | Comment                                                                                                                                                                                                                                                                         |
|------------------|-------------|--------------------------------------------|-----------------------------------------|---------------------------------------------------------------------------------------------------------------------------------------------------------------------------------------------------------------------------------------------------------------------------------|
| Taxonera C et al |             | 1906                                       | 12                                      | <ul style="list-style-type: none"> <li>• Crude incidence rate of COVID-19: 6.2/1000 patients of IBD</li> <li>• Age-adjusted Incidence rate of COVID-19: 4.9/1000</li> </ul>                                                                                                     |
| Lukin DJ et al   | <40 years   | 41 (45.6%)                                 | 10 (34.5%)                              | <ul style="list-style-type: none"> <li>• COVID-19 infected IBD patients had higher age compared to non-COVID, though statistically non-significant</li> </ul>                                                                                                                   |
|                  | >40 years   | 49 (54.4%)                                 | 19 (65.5%)                              |                                                                                                                                                                                                                                                                                 |
| Gubatan J et al  |             | 163                                        | 5                                       | <ul style="list-style-type: none"> <li>• COVID-19 infected IBD patients had higher age compared to non-COVID (mean age, 70.6 vs. 47.0 years), p value &lt;0.001</li> <li>• On multivariate analysis, age &gt;66 years was associated with increased risk of COVID-19</li> </ul> |
| Mosli M et al    | <16 years   | 23 (2.0%)                                  | 0                                       |                                                                                                                                                                                                                                                                                 |
|                  | 17-40 years | 977 (84.6%)                                | 3 (50%)                                 |                                                                                                                                                                                                                                                                                 |
|                  | >40 years   | 155 (13.4%)                                | 3 (50%)                                 |                                                                                                                                                                                                                                                                                 |
| Khan N et al     |             | 37821                                      | 36                                      | <ul style="list-style-type: none"> <li>• COVID-19 infected IBD patients had similar age (Mean age, 60.9 years vs 63.0 years)</li> </ul>                                                                                                                                         |









Supplementary Figure 1: Pooled incidence of COVID infection in patients with IBD for studies having a mean age of < 45 years and those with mean age > 45 years

### Incidence of COVID-19 in IBD matched for age

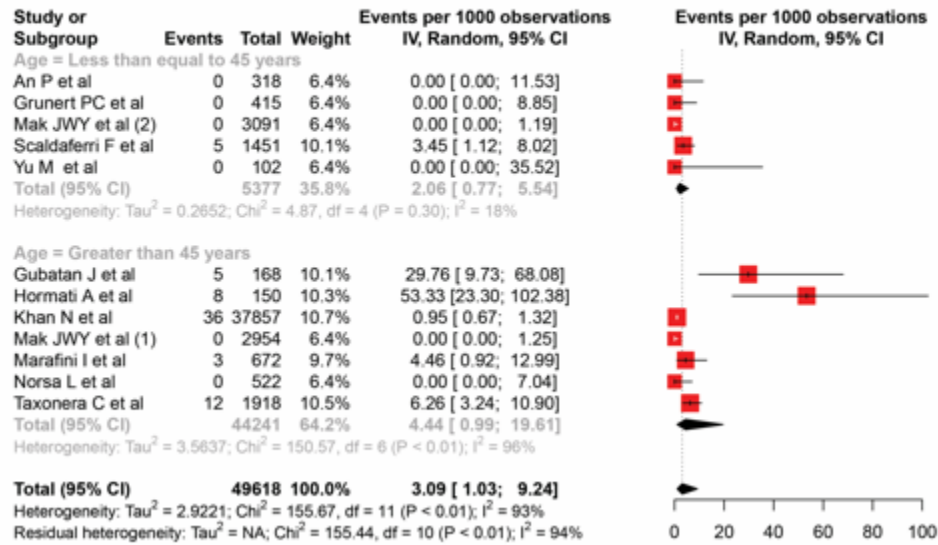

Supplementary Figure 2: Pooled incidence of COVID infection in UC and CD and relative risk of COVID in UC vs CD. The pooled summary was computed by random effect approach. Abbreviation: CD - Crohn's disease; CI - confidence interval; UC - Ulcerative colitis.

### Incidence of COVID-19 in UC vs CD

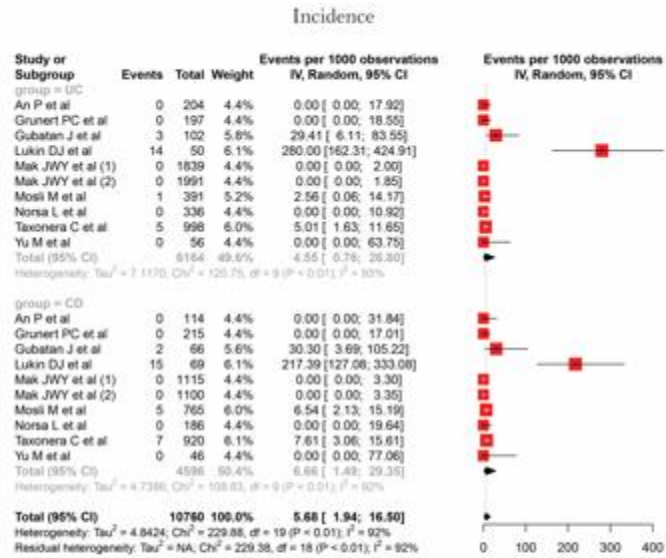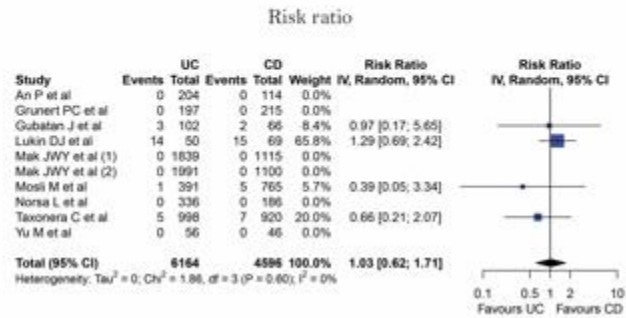

Supplementary Figure 3: Assessment of heterogeneity for risk of COVID infection in IBD and general population using Baujat plot and Leave one out analysis

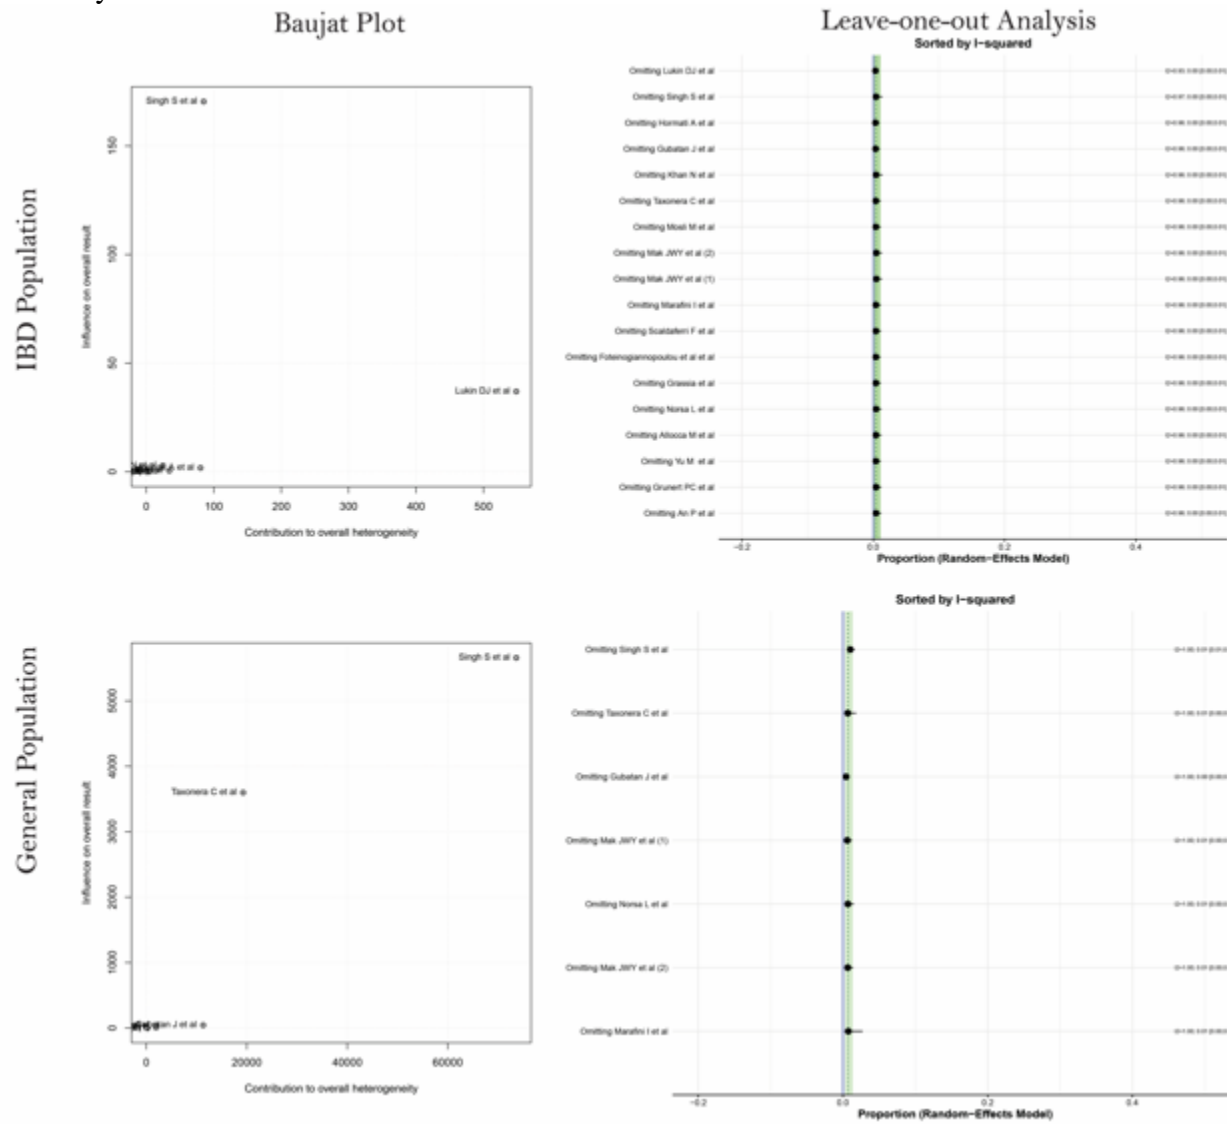

Supplementary Figure 4: Assessment of heterogeneity for outcomes of COVID infection in IBD using Baujat plot and Leave one out analysis

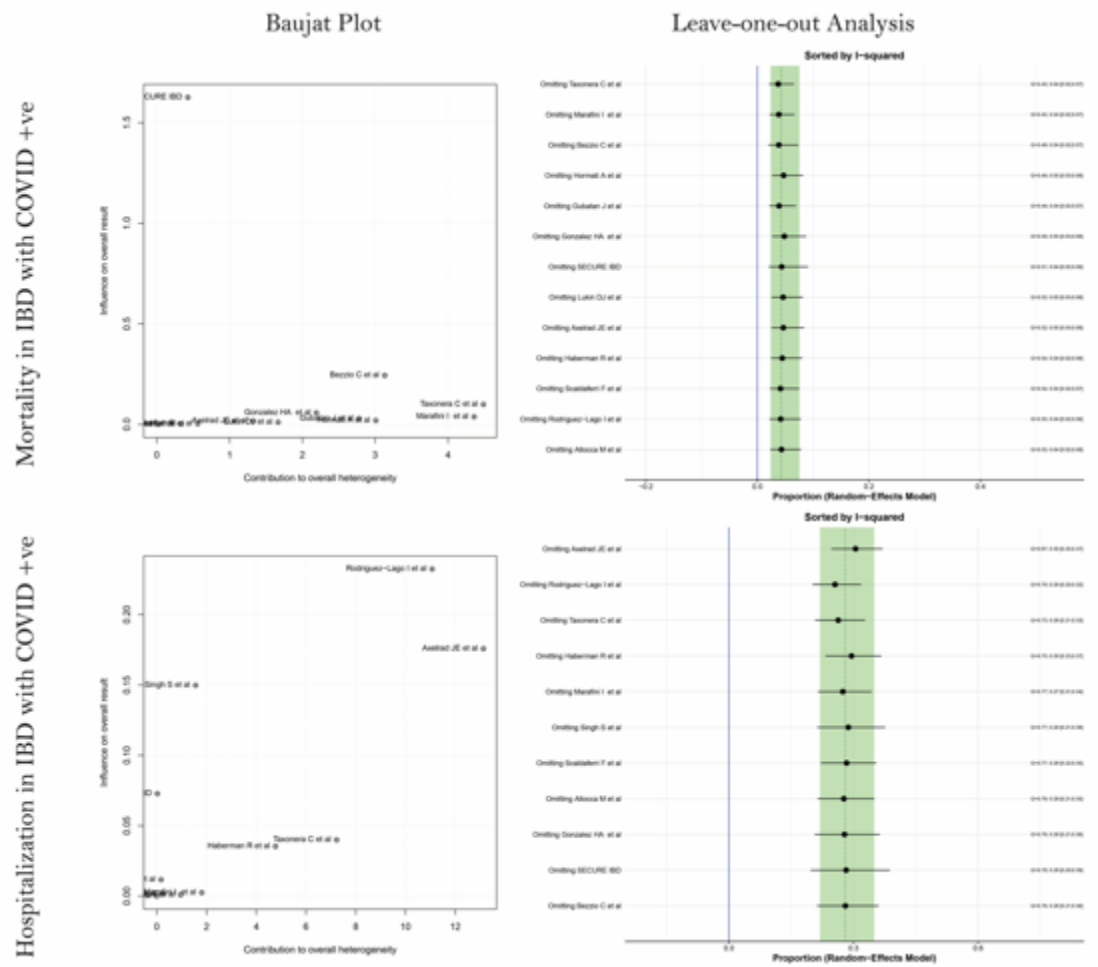

Supplement: UEG2-9-159-s001.pdf [file UEG2-9-159-s001.pdf]
